# Supplementary figures and images for: In-plane particle counting at contact lines of evaporating colloidal drops: effect of the particle electric charge
Source: Royal Society of Chemistry journal article supplement (doi:10.1039/c4sm02693d), 2014-12-10

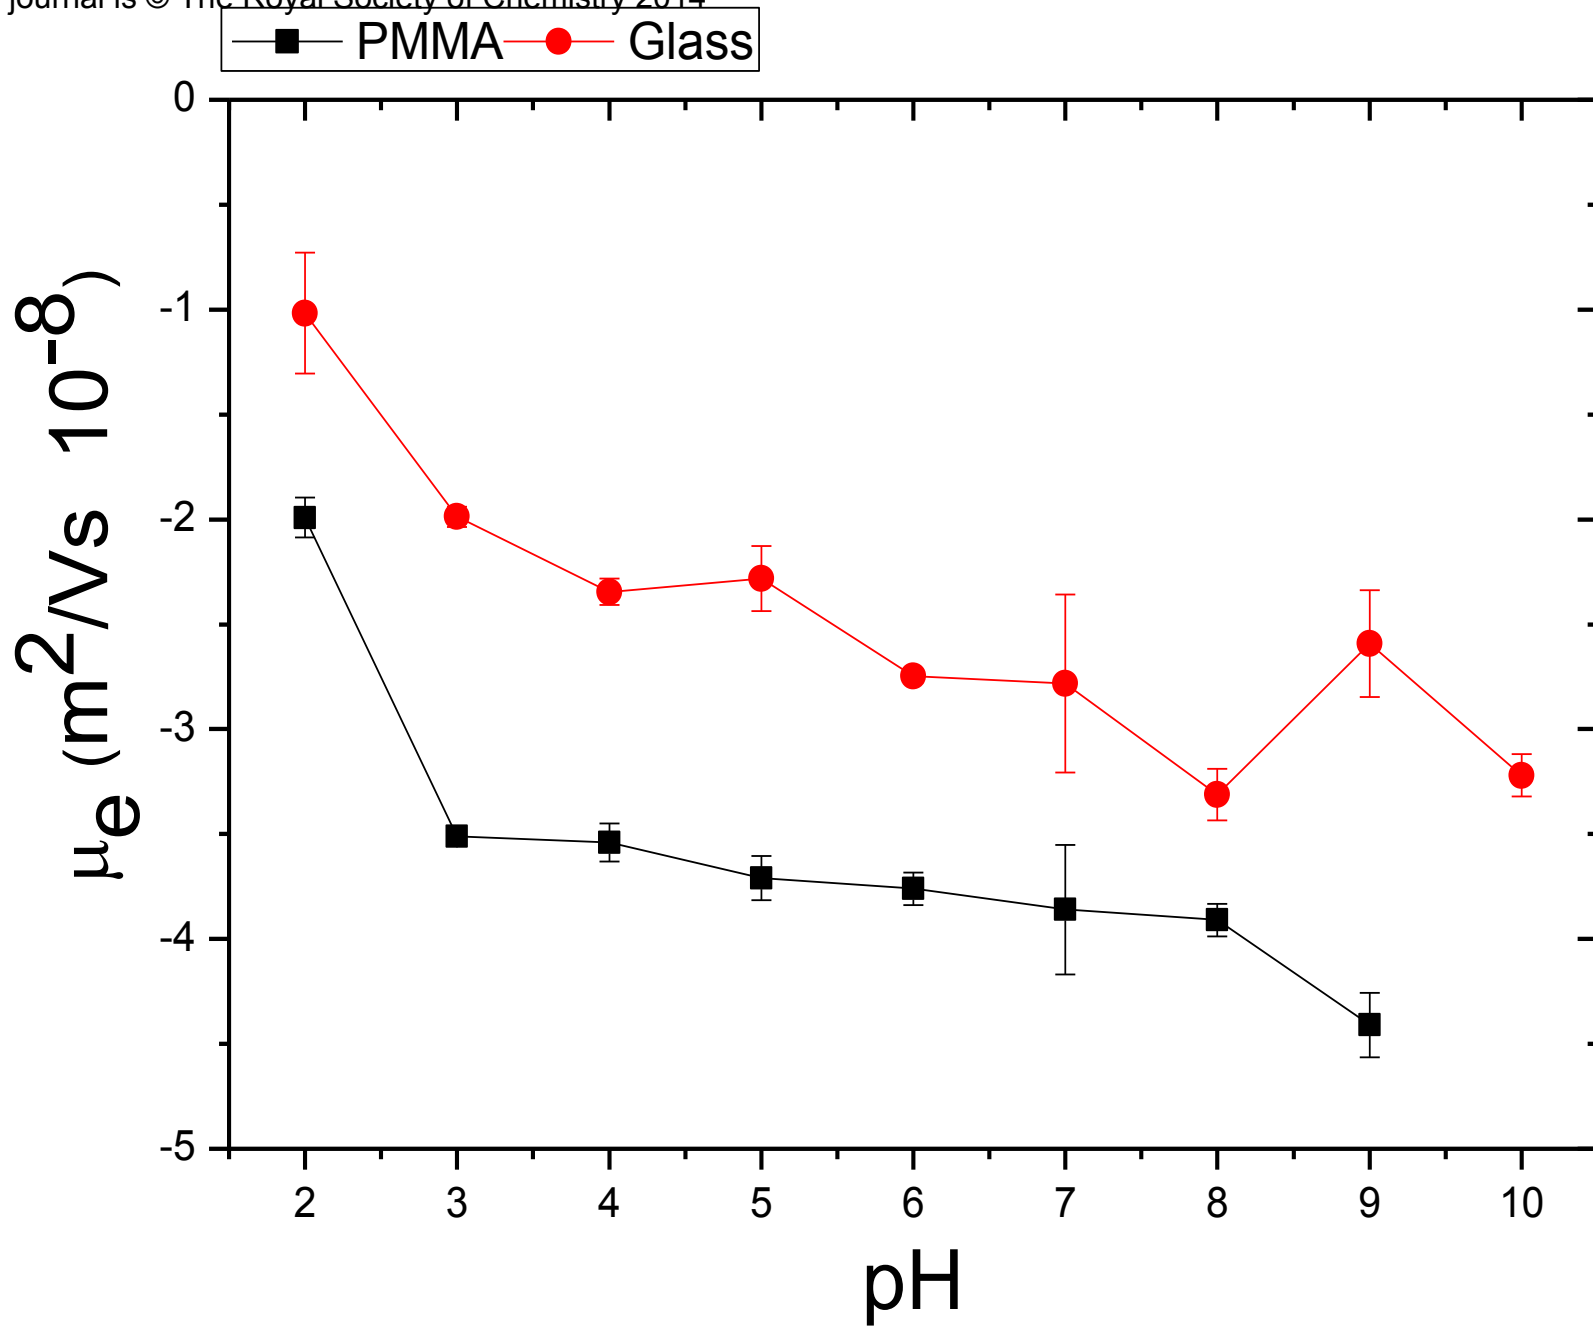

Supplement: c4sm02693d1.pdf [file c4sm02693d1.pdf]

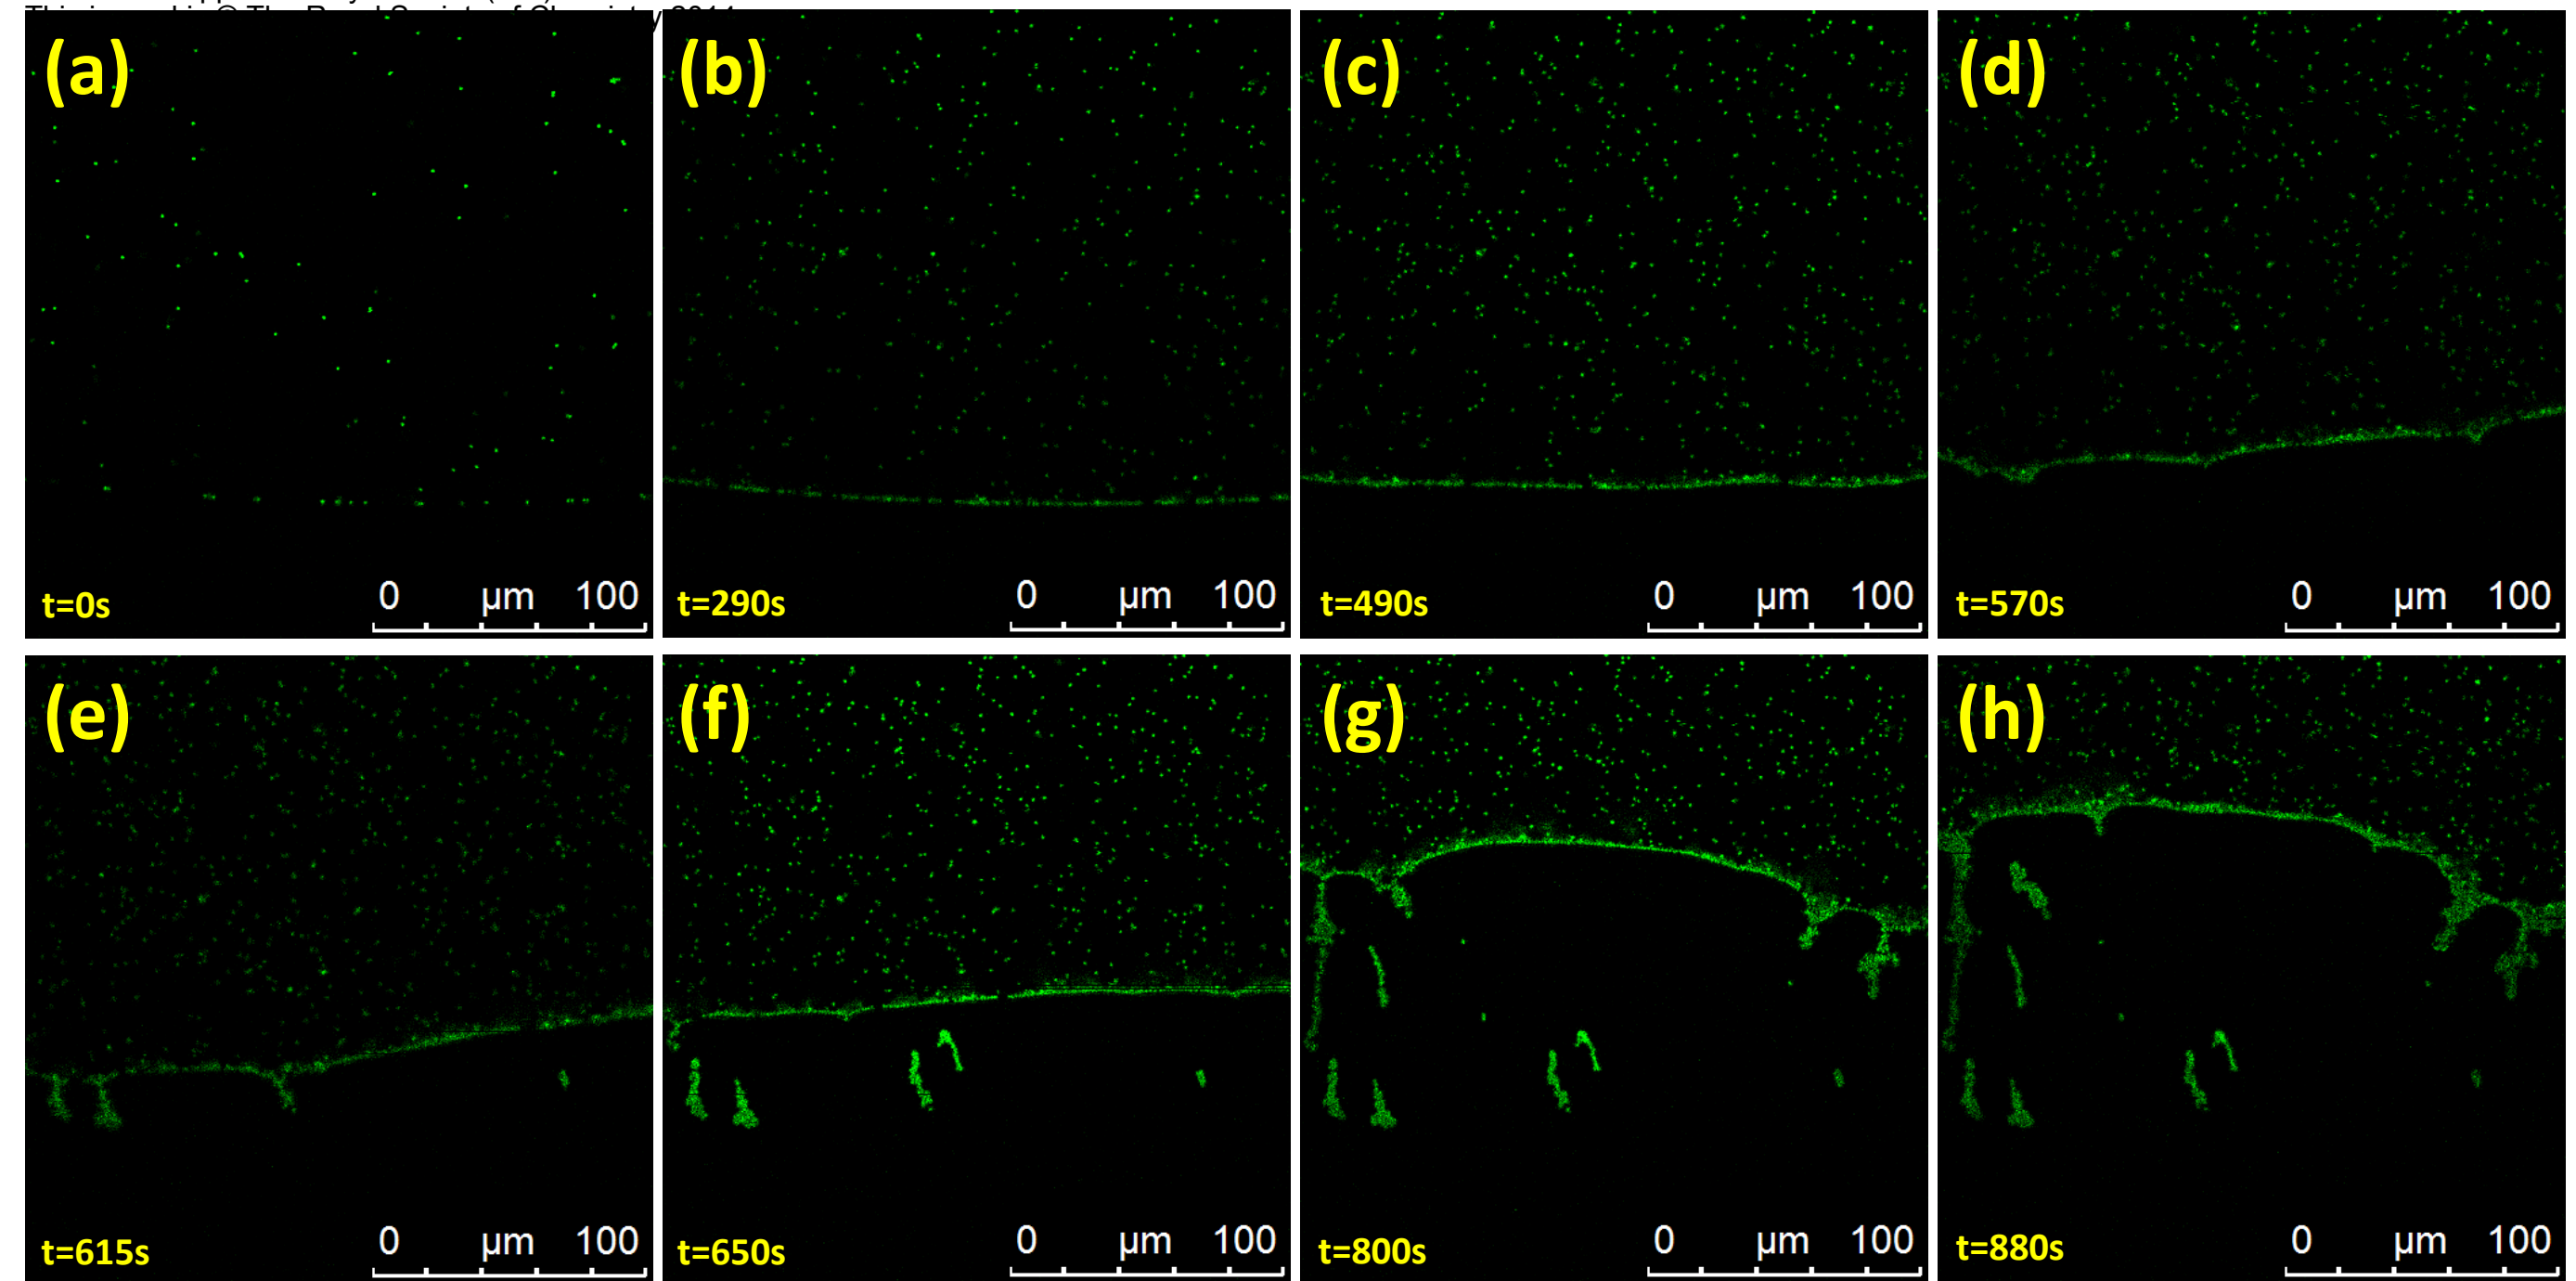

Supplement: c4sm02693d2.pdf [file c4sm02693d2.pdf]
